# Supplementary material for: A mechanism for acetylcholine receptor gating based on structure, coupling, phi, and flip
Source: PubMed Central journal article supplement — J Gen Physiol. 2017 Jan;149(1):85–103. doi: 10.1085/jgp.201611673 (PMC5217088; doi:10.1085/jgp.201611673), 2017-01
Supplement: JGP_201611673_sm.pdf [file JGP_201611673_sm.pdf]

## SUPPLEMENTAL MATERIAL

Gupta et al., <https://doi.org/10.1085/jgp.201611673>

### Phi and r values

We modify and extend phi ( $\Phi$ ) analysis of a linear Markov reaction chain with absorbing end states (C and O) separated by  $n$  short-lived, intermediate states ( $T_{1-n}$ ) that we define as the TSE (Zhou et al., 2005):

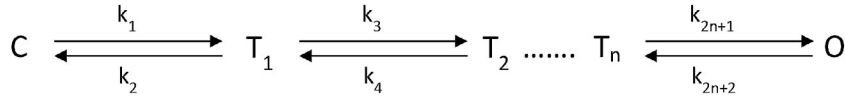

Assuming that the exit rate constants from the end states ( $k_1$  and  $k_{2n+2}$ ) are much smaller than all of the other rate constants, the mean first passage rate for a complete  $C \rightarrow O$  transition ( $k_f$ ) is

$$k_f = \frac{k_1}{1 + \sum_{j=1}^n \prod_{i=1}^j r_i}, \quad (S1)$$

where  $r_j$  is the ratio of the exit rates (backward/forward) from  $T_j$ . Defining the denominator as  $M$ , the  $\Phi$  values of the reaction chain (first derivative of the rate-equilibrium free energy relationships) are

$$\Phi_q = \frac{\sum_{i=q}^n \prod_{j=1}^i r_j}{M}. \quad (S2)$$

Note that this corrects Eq. 16 in Zhou et al. (2005).

There are five phi populations for diliganded AChR gating, so  $n = 4$  and

$$\begin{aligned} \Phi_1 &= \frac{(r_1 + r_1 r_2 + r_1 r_2 r_3 + r_1 r_2 r_3 r_4)}{M} \\ \Phi_2 &= \frac{(r_1 r_2 + r_1 r_2 r_3 + r_1 r_2 r_3 r_4)}{M} \\ \Phi_3 &= \frac{(r_1 r_2 r_3 + r_1 r_2 r_3 r_4)}{M} \\ \Phi_4 &= \frac{(r_1 r_2 r_3 r_4)}{M}. \end{aligned} \quad (S3)$$

$\Phi_5 = 0$ , by definition. An example WT energy landscape is the solid line and for a  $\Phi_2$  perturbation is the dashed line:

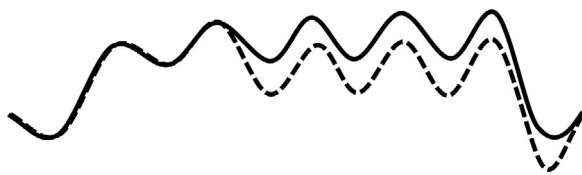

The  $r$  values can be calculated from the  $\Phi$  values by solving simultaneous equations represented by a matrix equation:  $AY = B$ .  $A$  is an  $n$ -by- $n$  square matrix and  $Y$  and  $B$  are column vectors of length  $n$ :

$$A_{ij} = \begin{cases} \Phi_i, & i < j \\ (1 - \Phi_i), & i \geq j \end{cases} \quad (S4)$$

$$Y_i = \prod_{j=1}^i r_j$$

$$B_i = \Phi_i.$$

$Y$ , and hence  $r_j$  values, can be obtained by finding the matrix inverse of  $A$  ( $Y = A^{-1}B$ ). For  $n = 4$ , Eq. S4 is

$$\begin{bmatrix} (1 - \Phi_1) & (1 - \Phi_1) & (1 - \Phi_1) & (1 - \Phi_1) \\ -\Phi_2 & (1 - \Phi_2) & (1 - \Phi_2) & (1 - \Phi_2) \\ -\Phi_3 & -\Phi_3 & (1 - \Phi_3) & (1 - \Phi_3) \\ -\Phi_4 & -\Phi_4 & -\Phi_4 & (1 - \Phi_4) \end{bmatrix} \begin{bmatrix} Y_1 \\ Y_2 \\ Y_3 \\ Y_4 \end{bmatrix} = \begin{bmatrix} \Phi_1 \\ \Phi_2 \\ \Phi_3 \\ \Phi_4 \end{bmatrix}. \quad (S5)$$

We write explicitly the set of four simultaneous equations:

$$\begin{aligned}
(1 - \Phi_1) \cdot Y_1 + (1 - \Phi_1) \cdot Y_2 + (1 - \Phi_1) \cdot Y_3 + (1 - \Phi_1) \cdot Y_4 &= \Phi_1 \\
-\Phi_2 \cdot Y_1 + (1 - \Phi_2) \cdot Y_2 + (1 - \Phi_2) \cdot Y_3 + (1 - \Phi_2) \cdot Y_4 &= \Phi_2 \\
-\Phi_3 \cdot Y_1 - \Phi_3 \cdot Y_2 + (1 - \Phi_3) \cdot Y_3 + (1 - \Phi_3) \cdot Y_4 &= \Phi_3 \\
-\Phi_4 \cdot Y_1 - \Phi_4 \cdot Y_2 - \Phi_4 \cdot Y_3 + (1 - \Phi_4) \cdot Y_4 &= \Phi_4.
\end{aligned}$$

Solving these equations for  $Y_i$ ,

$$Y_1 = r_1; Y_2 = r_1 r_2; Y_3 = r_1 r_2 r_3; Y_4 = r_1 r_2 r_3 r_4.$$

The experimental diliganded AChR gating phi values are  $\Phi_1 = 0.95$ ,  $\Phi_2 = 0.79$ ,  $\Phi_3 = 0.58$ , and  $\Phi_4 = 0.33$  ( $\Phi_5 = 0.06$ ; Fig. 6 A). Solving for  $Y$  (MATLAB R2014b; The MathWorks Inc.) and using the experimental  $k_f$  value of  $2 \text{ ms}^{-1}$  when the overall C-to-O equilibrium constant is equal to 1, the solution is  $r_1 = 3.20$ ,  $r_2 = 1.32$ ,  $r_3 = 1.19$ , and  $r_4 = 1.32$ . These values yield  $M = 19.96$  and Scheme 3 (rate constants,  $\text{ms}^{-1}$ ).

From the hypothetical energy landscape for unliganded gating (Fig. 6 E), we calculate  $r$  values of  $r_1 = 3,200$ ,  $r_2 = 1.32$ ,  $r_3 = 1.19$ , and  $r_4 = 1.32$ , to yield Scheme 5. From these  $r$  values, we calculate (Eq. S3) unliganded phi values of  $\Phi_1 = 0.99$ ,  $\Phi_3 = 0.83$ ,  $\Phi_3 = 0.61$ , and  $\Phi_4 = 0.35$ .

### Committer

The position in the reaction chain where there is an equal probability of entering rapidly either absorbing end state is called the committor or separatrix ( $\ddagger$ ). The position of  $\ddagger$  in the TSE was calculated (by optimization) from the A matrix (Qin et al., 1996) as the position in the Markov chain in which the probabilities of reaching either absorbing state were equal after time  $t$  (long compared with sojourns in the TSE and short compared sojourns in the end states; by Chris Nicolai; <http://www.qub.buffalo.edu/online/committor.html>). A  $\ddagger$  position between T states is the relative probability of either flanking state. In Scheme 3 and with all  $k$  values =  $300 \text{ ms}^{-1}$ , the  $\ddagger$  probabilities were 80% in  $T_3$  and 20% in  $T_4$ .

### Transmission coefficient

In Eyring theory, a TS is the point intersection of end-state parabolic wells, and a transmission coefficient ( $\kappa$ ) corrects the rate constant for TS re-crossings. In Kramers theory, the separating barrier is a parabola and  $\kappa$  is proportional to the product of a diffusion constant and the barrier frequency (width) under the condition of moderate to high friction (Billing and Mikkelsen, 1996). Here,  $r$  values (phi values) set the overall barrier shape and  $\kappa$  is the fraction of exits from an end state that reach the committor  $\ddagger$ , which by definition is crossed with a 50% probability.

With absorbing end states, the number of exits from C that result in one complete passage to O is  $M$ . The fraction of visits to  $\ddagger$  is, then,  $2/M$ :

$$\begin{aligned}
\kappa_{C \rightarrow O} &= 2 \cdot \left(1 + \sum_{i=1}^n \prod_{j=1}^i r_j\right)^{-1} \\
\text{and} \\
\kappa_{O \rightarrow C} &= 2 \cdot \left(1 + \sum_{i=n}^1 \prod_{j=n}^i \frac{1}{r_j}\right)^{-1}.
\end{aligned} \tag{S6}$$

Note that these correct Eqs. 8 and 9 in Zhou et al. (2005). From the  $r$  values for diliganded gating Scheme 3,  $\kappa_{C \rightarrow O} = 0.10$  and  $\kappa_{O \rightarrow C} = 0.66$ , and for unliganded gating Scheme 5,  $\kappa_{C \rightarrow O} = 1.1\text{E-}4$  and  $\kappa_{O \rightarrow C} = 0.7$ . With regard to the mean number of the exit attempts required for a full crossing ( $=2/\kappa$ ), these four values correspond to approximately 20, 3, 18,000, and 3, respectively.

With ACh, the assumption that the exit rate constant from C  $\ll$  than the other rate constants is not valid. Specifically, the exit rate from C ( $k_1$ ) is likely to be similar to the rate for exiting the TSE ( $k_{\text{TSE}}$ ). Accordingly,

$$\kappa_{C \rightarrow O} = 2 k_f \left( \frac{1}{k_1} + \frac{1}{k_{\text{TSE}}} \right). \tag{S7}$$

The mean number the of exit attempts required for a full C $\rightarrow$ O crossing is the inverse of half this value.

In WT AChRs with two bound ACh,  $k_f = 50 \text{ ms}^{-1}$  ( $-100 \text{ mV}$ ,  $23^\circ\text{C}$ ). However,  $k_1$  is not known, and  $k_{\text{TSE}}$  depends on the absolute values of the rate constants in Scheme 3. In Fig. 6 E, we have assumed  $k_1 = 1,000 \text{ ms}^{-1}$ , which is close to maximal (Chakrapani and Auerbach, 2005). With  $k_3$ ,  $k_5$ ,  $k_7$ , and  $k_9$  in Scheme 3 all equal to  $300 \text{ ms}^{-1}$ ,  $k_{\text{TSE}} \approx 180 \text{ ms}^{-1}$  (the inverse of the longest TSE time constant,  $1/5.6 \mu\text{s}$ ; Fig. 6 B), and we calculate using Eq. S7 that  $\kappa_{C \rightarrow O} = 0.66$ . With these assumptions regarding  $k_1$  and  $k_{\text{TSE}}$ , the mean number of exit attempts from C before achieving a full C $\rightarrow$ O crossing is  $(\kappa_{C \rightarrow O}/2)^{-1}$  or  $\sim 3$ . The O $\rightarrow$ T $_4$  rate constant is slow with or without ACh, so the mean number of exit attempts from O before achieving a full O $\rightarrow$ C crossing is in both cases also  $\sim 3$ .

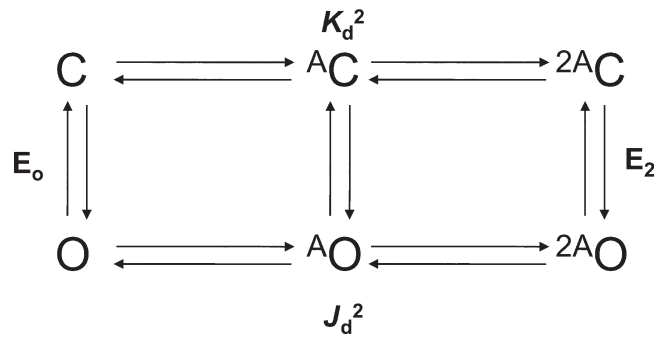

Figure S1. **Cyclic activation model.** C, closed-channel conformation; O, open-channel conformation; superscript A, agonist;  $K_d$ , low-affinity equilibrium dissociation constant;  $J_d$ , high-affinity equilibrium dissociation constant;  $E_0$ , unliganded gating equilibrium constant;  $E_2$ , gating equilibrium constant with two bound agonists. Without external energy, the product of equilibrium constants connecting any two states is independent of the pathway (Hess's law). Considering C and  $2^A$ O:  $(1/K_d^2) \cdot (E_2) = (E_0) \cdot (1/J_d^2)$  or,  $E_2/E_0 = (K_d/J_d)^2$ .

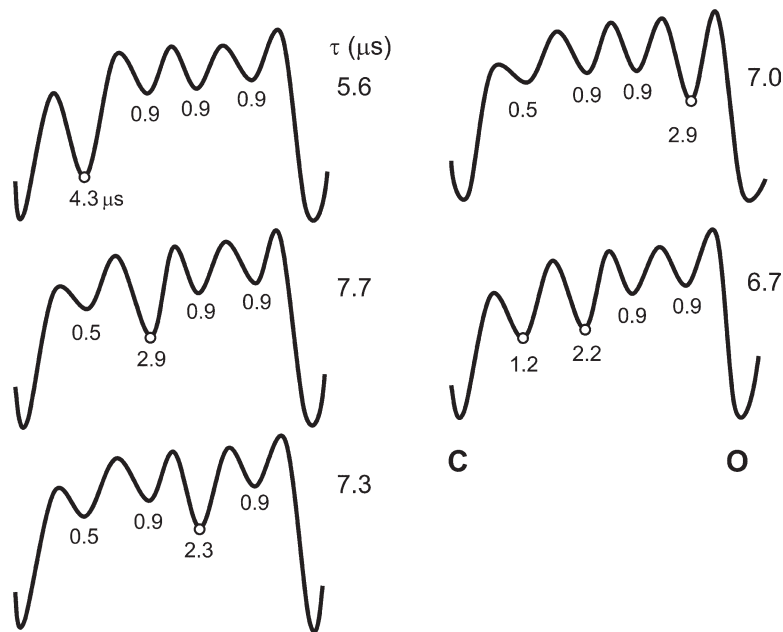

Figure S2. **Energy landscapes corresponding to Scheme 3 with  $k = 500 \text{ ms}^{-1}$ , except for the intermediate state(s) marked by an open circle (Table S3).**  $\tau$  is the brief shut interval flip/primed lifetime measured after filtering and fitting by C-C'-O (Fig. 6 C). Lifetime ( $\mu$ s) of each TSE intermediate state is shown below each well.

Video 1. **A model of AChR gating.** Part 1 (~2 min): Description of the model detailing the structural components, energy landscape, sequence of rearrangements, and corresponding kinetic scheme. Part 2 (~3 min): Simulations of the model at three different time scales. (top left) Cartoon structure showing components that switch between locally off (black) and on (red) conformations; (top right) gating energy landscape; (bottom) simulated single-channel current. (i) 100 kHz (10  $\mu$ s/sample). Only sojourns in C and O are clearly resolved. (ii) 2 MHz (500 ns/sample). Sojourns in the T states are also resolved. Notice that C $\rightarrow$ T structural transitions occur in long-duration shut intervals without a change in current and that brief closures in the current trace (flip/primed events) mainly reflect gate bubble formation. (iii) 50 MHz (20 ns/sample) using two different kinetic models (see Fig. S2).

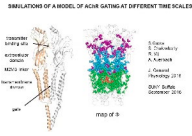

Table S1. Backgrounds for MCA analysis

| Mutation(s)                                                  | Agonist    | Mutant pair                                                                                                                                                    |
|--------------------------------------------------------------|------------|----------------------------------------------------------------------------------------------------------------------------------------------------------------|
| $\alpha$ A96V                                                | 100 mM ACh | $\alpha$ S268P+ $\alpha$ Y190P                                                                                                                                 |
| $\alpha$ C418W                                               | 100 mM ACh | $\alpha$ S268A+ $\alpha$ G147A, $\alpha$ P265A+ $\alpha$ G147A, $\alpha$ P265A+ $\alpha$ W149A, $\alpha$ I260P+ $\alpha$ G147A, $\alpha$ I260P+ $\alpha$ W149P |
| $\alpha$ C418Y                                               | 100 mM ACh | $\alpha$ P265A+ $\alpha$ Y198A                                                                                                                                 |
|                                                              | 100 mM Cho | $\alpha$ S268A+ $\epsilon$ P121A, $\alpha$ S268A+ $\epsilon$ P121S, $\alpha$ S268A+ $\delta$ P123A                                                             |
| $\alpha$ C418W+ $\delta$ I43Q                                | 100 mM ACh | $\alpha$ P265G+ $\alpha$ W149P                                                                                                                                 |
| $\alpha$ C418Y+ $\delta$ I43Q                                | 100 mM ACh | $\alpha$ I260P+ $\alpha$ Y190P                                                                                                                                 |
| $\beta$ T456F                                                | 100 mM ACh | $\alpha$ P265A+ $\alpha$ Y190F, $\alpha$ I260P+ $\delta$ P123G,                                                                                                |
| $\beta$ T456F+ $\delta$ I43H                                 | 100 mM ACh | $\alpha$ P265A+ $\alpha$ Y93A, $\alpha$ I260P+ $\epsilon$ P121G,                                                                                               |
| $\beta$ T456I+ $\delta$ I43H                                 | 100 mM ACh | $\alpha$ P265A+ $\gamma$ P112A                                                                                                                                 |
| $\beta$ V229A+ $\delta$ I43Q                                 | 100 mM ACh | $\alpha$ S268P+ $\epsilon$ P121G, $\alpha$ P265G+ $\epsilon$ P121G                                                                                             |
| $\delta$ I43Q                                                | 20 mM Cho  | $\alpha$ S269A+ $\alpha$ T133A, $\alpha$ A270G+ $\alpha$ T133A, $\alpha$ S266A+ $\epsilon$ K219A, $\alpha$ T267A+ $\epsilon$ K219A                             |
| $\delta$ I43H                                                | 100 mM ACh | $\alpha$ E262G+ $\alpha$ Y93A, $\alpha$ E262G+ $\alpha$ W149A, $\alpha$ L263G+ $\alpha$ Y93A, $\alpha$ L263G+ $\alpha$ W149A, $\alpha$ L263G+ $\alpha$ Y198A   |
| $\delta$ I43Q+ $\gamma$ L260Q                                | 100 mM ACh | $\alpha$ P265A+ $\alpha$ G147A( $\gamma$ )                                                                                                                     |
| $\epsilon$ L269F                                             | 100 mM ACh | $\alpha$ S268P+ $\alpha$ W149P                                                                                                                                 |
| $\alpha$ A96V+ $\beta$ V266A+ $\delta$ P123R                 | 100 mM ACh | $\gamma$ P121A+ $\alpha$ Y93A                                                                                                                                  |
| $\alpha$ A96V+ $\beta$ L262S+ $\delta$ L265S+ $\delta$ P123R | No agonist | $\gamma$ P121A+ $\alpha$ G147A                                                                                                                                 |
| $\beta$ L262S+ $\delta$ L265S+ $\delta$ P123R                | 100 mM ACh | $\gamma$ P121A+ $\alpha$ G147A, $\gamma$ P121A+ $\alpha$ W149A, $\gamma$ P121A+ $\alpha$ Y190A, $\gamma$ P121A+ $\alpha$ Y198A, $\gamma$ P121A+ $\gamma$ W55A  |
|                                                              | No agonist | $\gamma$ P121A+ $\alpha$ W149A, $\gamma$ P121A+ $\alpha$ Y198A                                                                                                 |
| $\delta$ P123R                                               | 100 mM ACh | $\gamma$ P121A+ $\alpha$ G153A                                                                                                                                 |

Table S2. Backgrounds for unliganded REFERs (Fig. 5)

| Mutation          | Background(s)                                     |
|-------------------|---------------------------------------------------|
| $\alpha$ I260M    | $\alpha$ (D97A+Y127F+S269I+W149F)                 |
| S                 | $\alpha$ (D97A+Y127F+S269I+W149F)+ $\delta$ V269C |
| A                 | $\alpha$ (D97A+Y127F+S269I+W149F+C418W)           |
| $\alpha$ E262G; L | $\alpha$ (D97A+Y127F+S269I+W149F)                 |
| $\alpha$ P265K    | $\alpha$ (D97A+Y127F+S269I+W149F+C418W)           |
| G                 | $\alpha$ (D97A+Y127F+S269I)                       |
| $\alpha$ S268E    | $\delta$ I43Q                                     |
| D                 | $\alpha$ (D97A+Y127F)                             |
| L                 | $\alpha$ (D97A+Y127F)+ $\delta$ V269C             |

Table S3. Simulation results using Scheme 3 and different k values

| k                | $\tau^{\text{sim}}$ | $\tau^{\text{flip}}$ | $k_f$            | $k_b$            |
|------------------|---------------------|----------------------|------------------|------------------|
| $\text{ms}^{-1}$ | $\mu\text{s}$       | $\mu\text{s}$        | $\text{ms}^{-1}$ | $\text{ms}^{-1}$ |
| 100              | 15.8                | 15.2                 | 35               | 30               |
| 200              | 8.4                 | 9.3                  | 51               | 55               |
| 300              | 5.6                 | 6.4                  | 61               | 82               |
| 400              | 4.3                 | 5.8                  | 61               | 107              |
| 500              | 3.5                 | 5.0                  | 58               | 137              |
| 600              | 2.9                 | 4.6                  | 49               | 161              |

$\tau^{\text{sim}}$  is the slowest component of the simulated TSE shut distribution (Fig. 6 B),  $\tau^{\text{flip}}$  is the fitted shut component in facsimile patch experiments (Fig. 6 C),  $k_b$  and  $k_f$  are the fitted exit rate constants from C', backward and forward. In experiments with human adult AChRs expressed in cells,  $\tau^{\text{flip}} \sim 9 \mu\text{s}$ ,  $k_f \sim 19 \text{ ms}^{-1}$ ,  $k_b \sim 86 \text{ ms}^{-1}$ .

Table S4. Effects of stabilizing individual TSE states

| n    | $\lambda$ | $\tau$  | $k_f$     | $k_b$     | $\Delta G$ | $k_{right}$ |
|------|-----------|---------|-----------|-----------|------------|-------------|
|      | $\mu s$   | $\mu s$ | $ms^{-1}$ | $ms^{-1}$ | $kcal/mol$ | $ms^{-1}$   |
| 1    | 5.2       | 5.6     | 46        | 128       | 1          | 55          |
| 2    | 6.3       | 7.7     | 37        | 88        | 0.74       | 150         |
| 3    | 6.1       | 7.3     | 53        | 80        | 0.5        | 200         |
| 4    | 5.9       | 7.0     | 79        | 62        | 0.7        | 150         |
| 1; 4 | 5.3       | 6.7     | 45        | 99        | 0.54       | 200         |

$\lambda$ ,  $\tau$ ,  $k_f$ , and  $k_b$ , as in Table S3.  $\Delta G$ , the free energy by which state(s) n was stabilized.  $k_{right}$ , forward exit rate constant from stabilized state(s). Corresponding energy landscapes are shown in Fig. S1.

## REFERENCES

- Billing, G.D., and K.V. Mikkelsen. 1996. Introduction to Molecular Dynamics and Chemical Kinetics. John Wiley & Sons, Inc., New York. 200 pp.
- Chakrapani, S., and A. Auerbach. 2005. A speed limit for conformational change of an allosteric membrane protein. *Proc. Natl. Acad. Sci. USA*. 102:87–92. <http://dx.doi.org/10.1073/pnas.0406777102>
- Qin, F., A. Auerbach, and F. Sachs. 1996. Estimating single-channel kinetic parameters from idealized patch-clamp data containing missed events. *Biophys. J.* 70:264–280. [http://dx.doi.org/10.1016/S0006-3495\(96\)79568-1](http://dx.doi.org/10.1016/S0006-3495(96)79568-1)
- Zhou, Y., J.E. Pearson, and A. Auerbach. 2005. Phi-value analysis of a linear, sequential reaction mechanism: theory and application to ion channel gating. *Biophys. J.* 89:3680–3685. <http://dx.doi.org/10.1529/biophysj.105.067215>
